# Supplementary material
Source: publisher site journal article supplement (https://www.dovepress.com/article/supplementary_file/578582/578582%20Revised%20Supplementary%20Material.docx)
Supplement: Supplementary file 1 [file 578582%20Revised%20Supplementary%20Material.docx]

**Supplementary Figures S1-S7**

**Supplementary Figures S1**

**
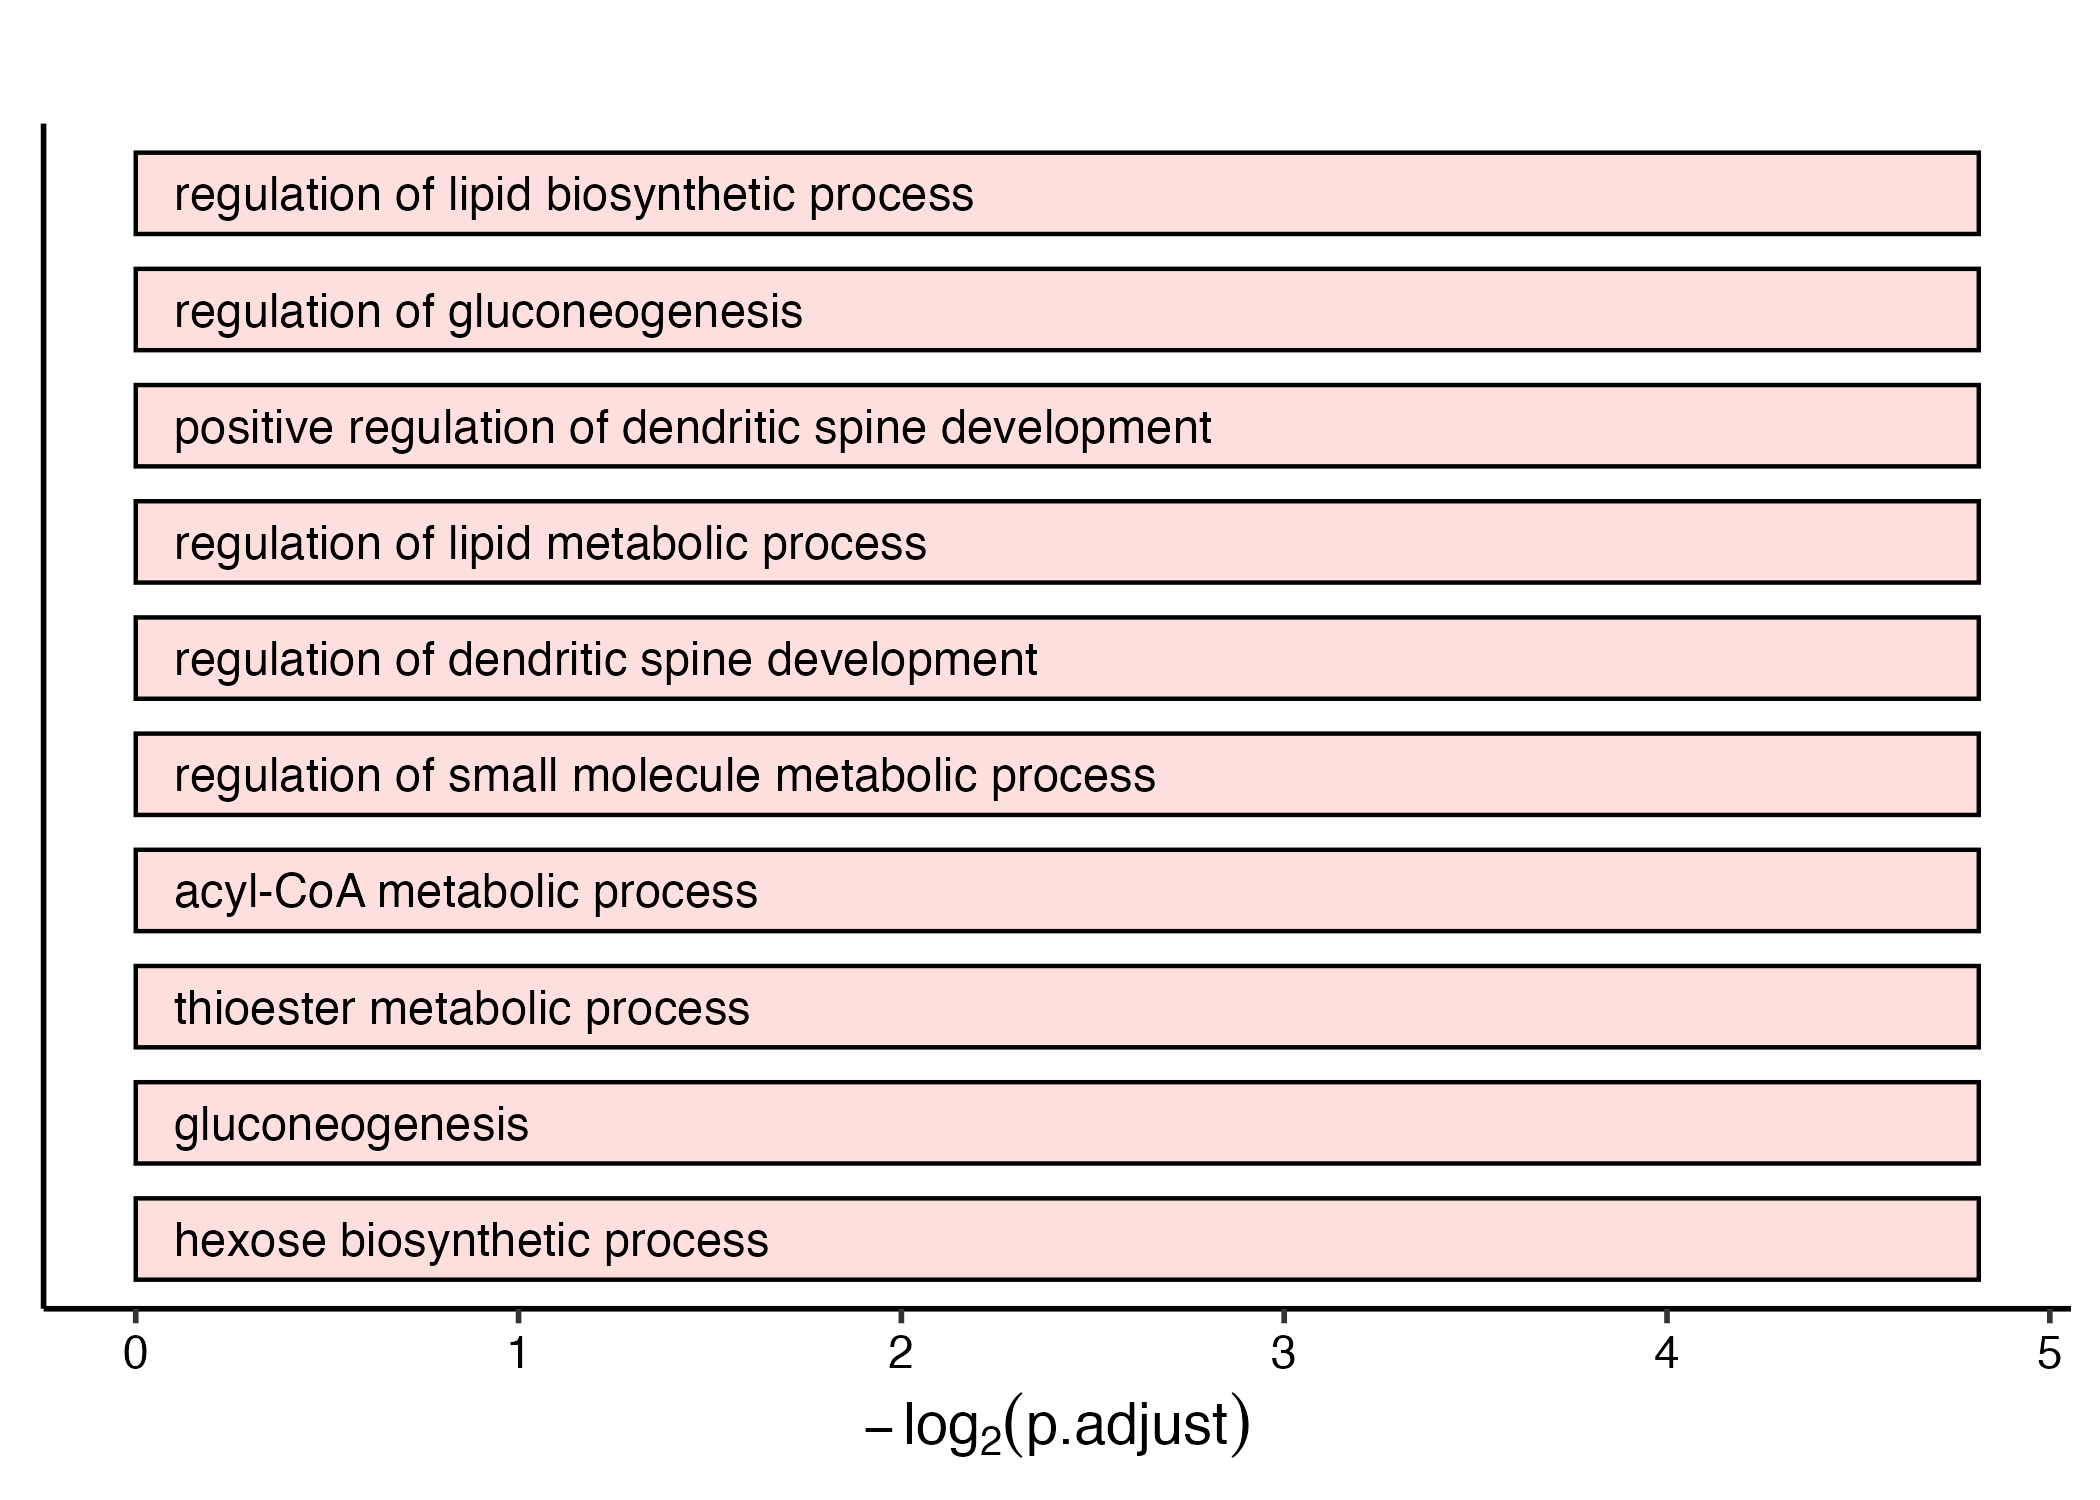

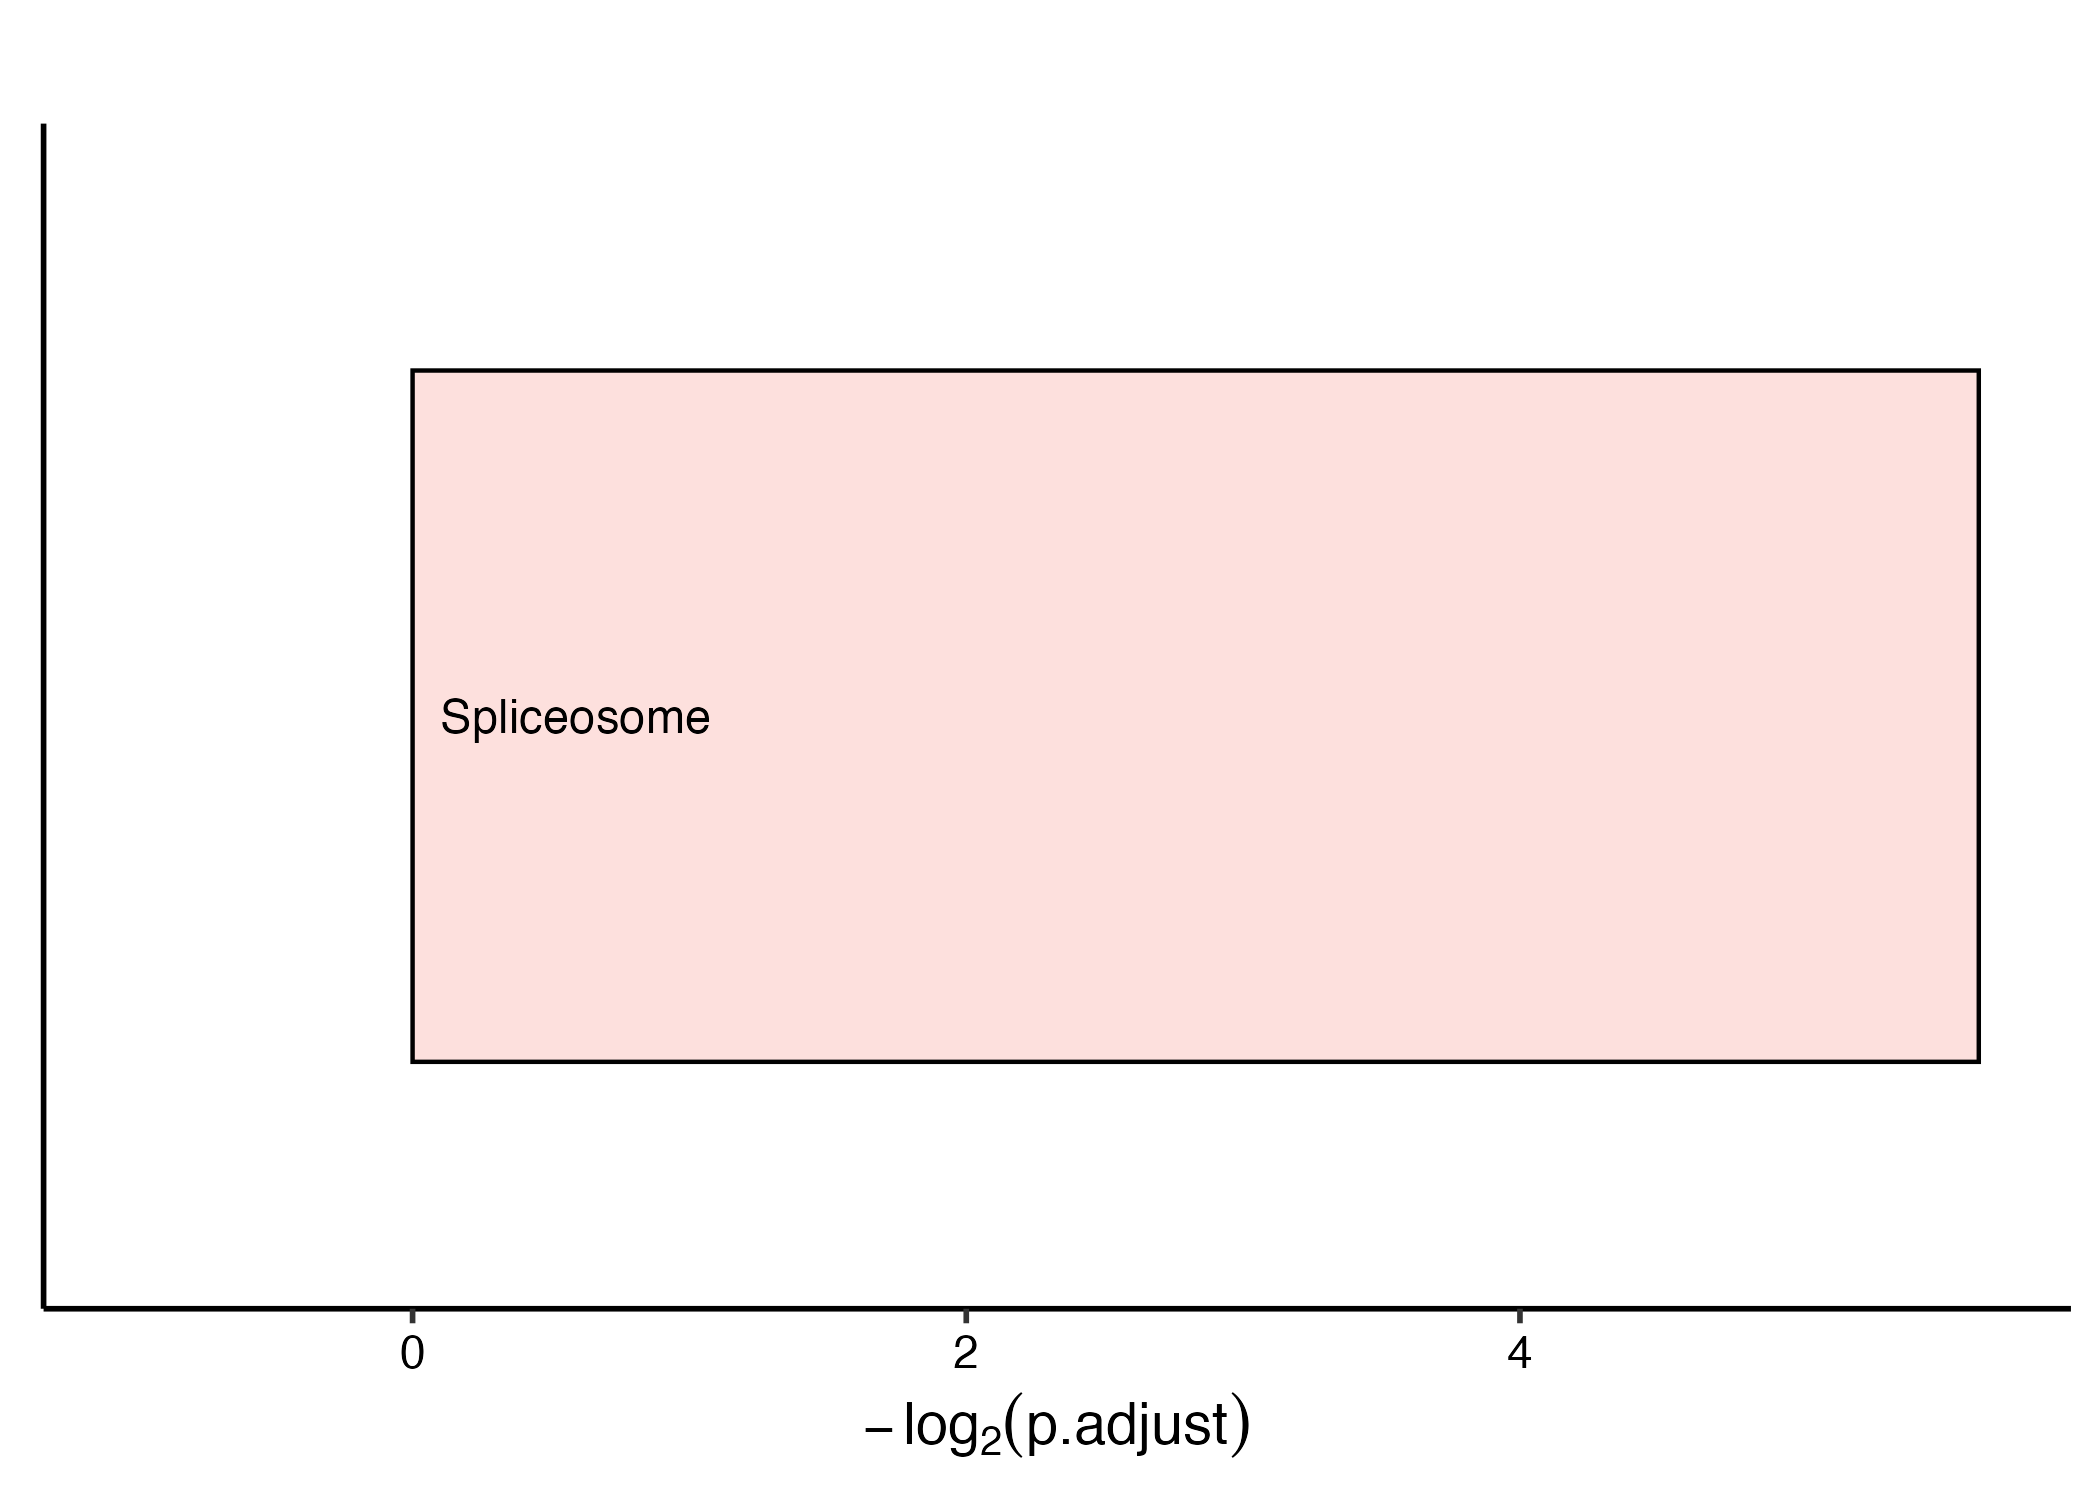
**

**A B**

(A) Functional enrichment analysis of protein-leading genes.

Gene Ontology (GO) enrichment analysis of genes in the protein-leading group (ΔPhase < 0), in which protein peak phases precede RNA peak phases. Bar plots show the significantly enriched GO biological processes for this group.

(B) Functional enrichment analysis of protein-lagging genes.

KEGG pathway enrichment analysis of genes in the protein-lagging group (ΔPhase > 0), in which protein peak phases follow RNA peak phases. Bar plots show the significantly enriched KEGG pathways for this group.

**Supplementary Figures S2**

**
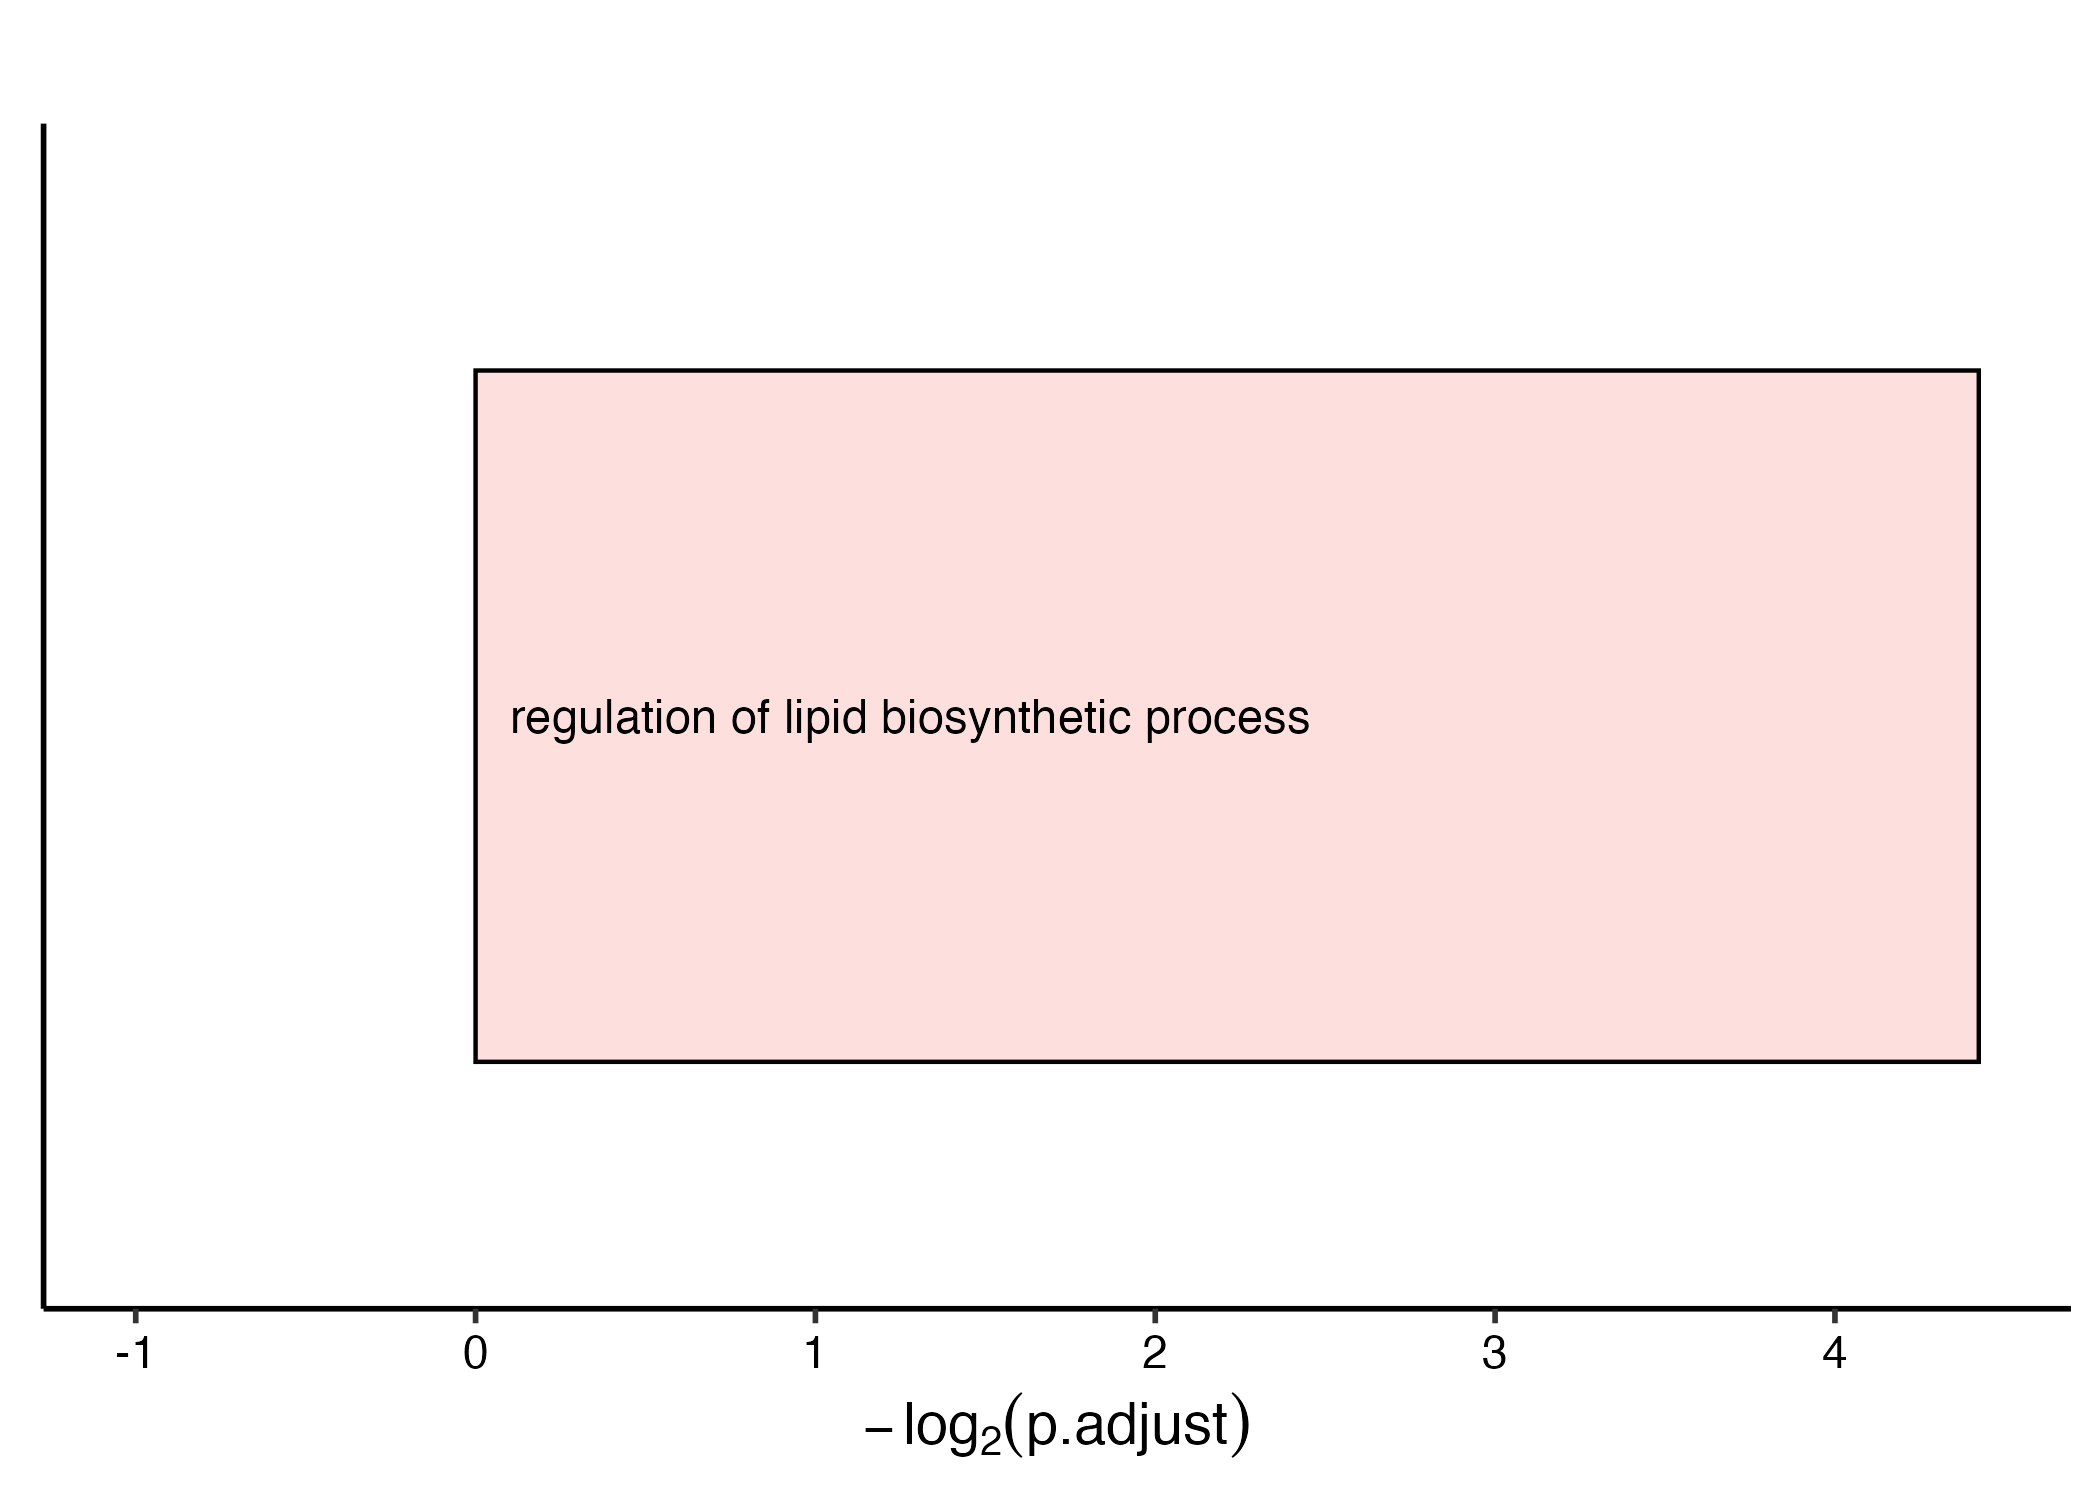

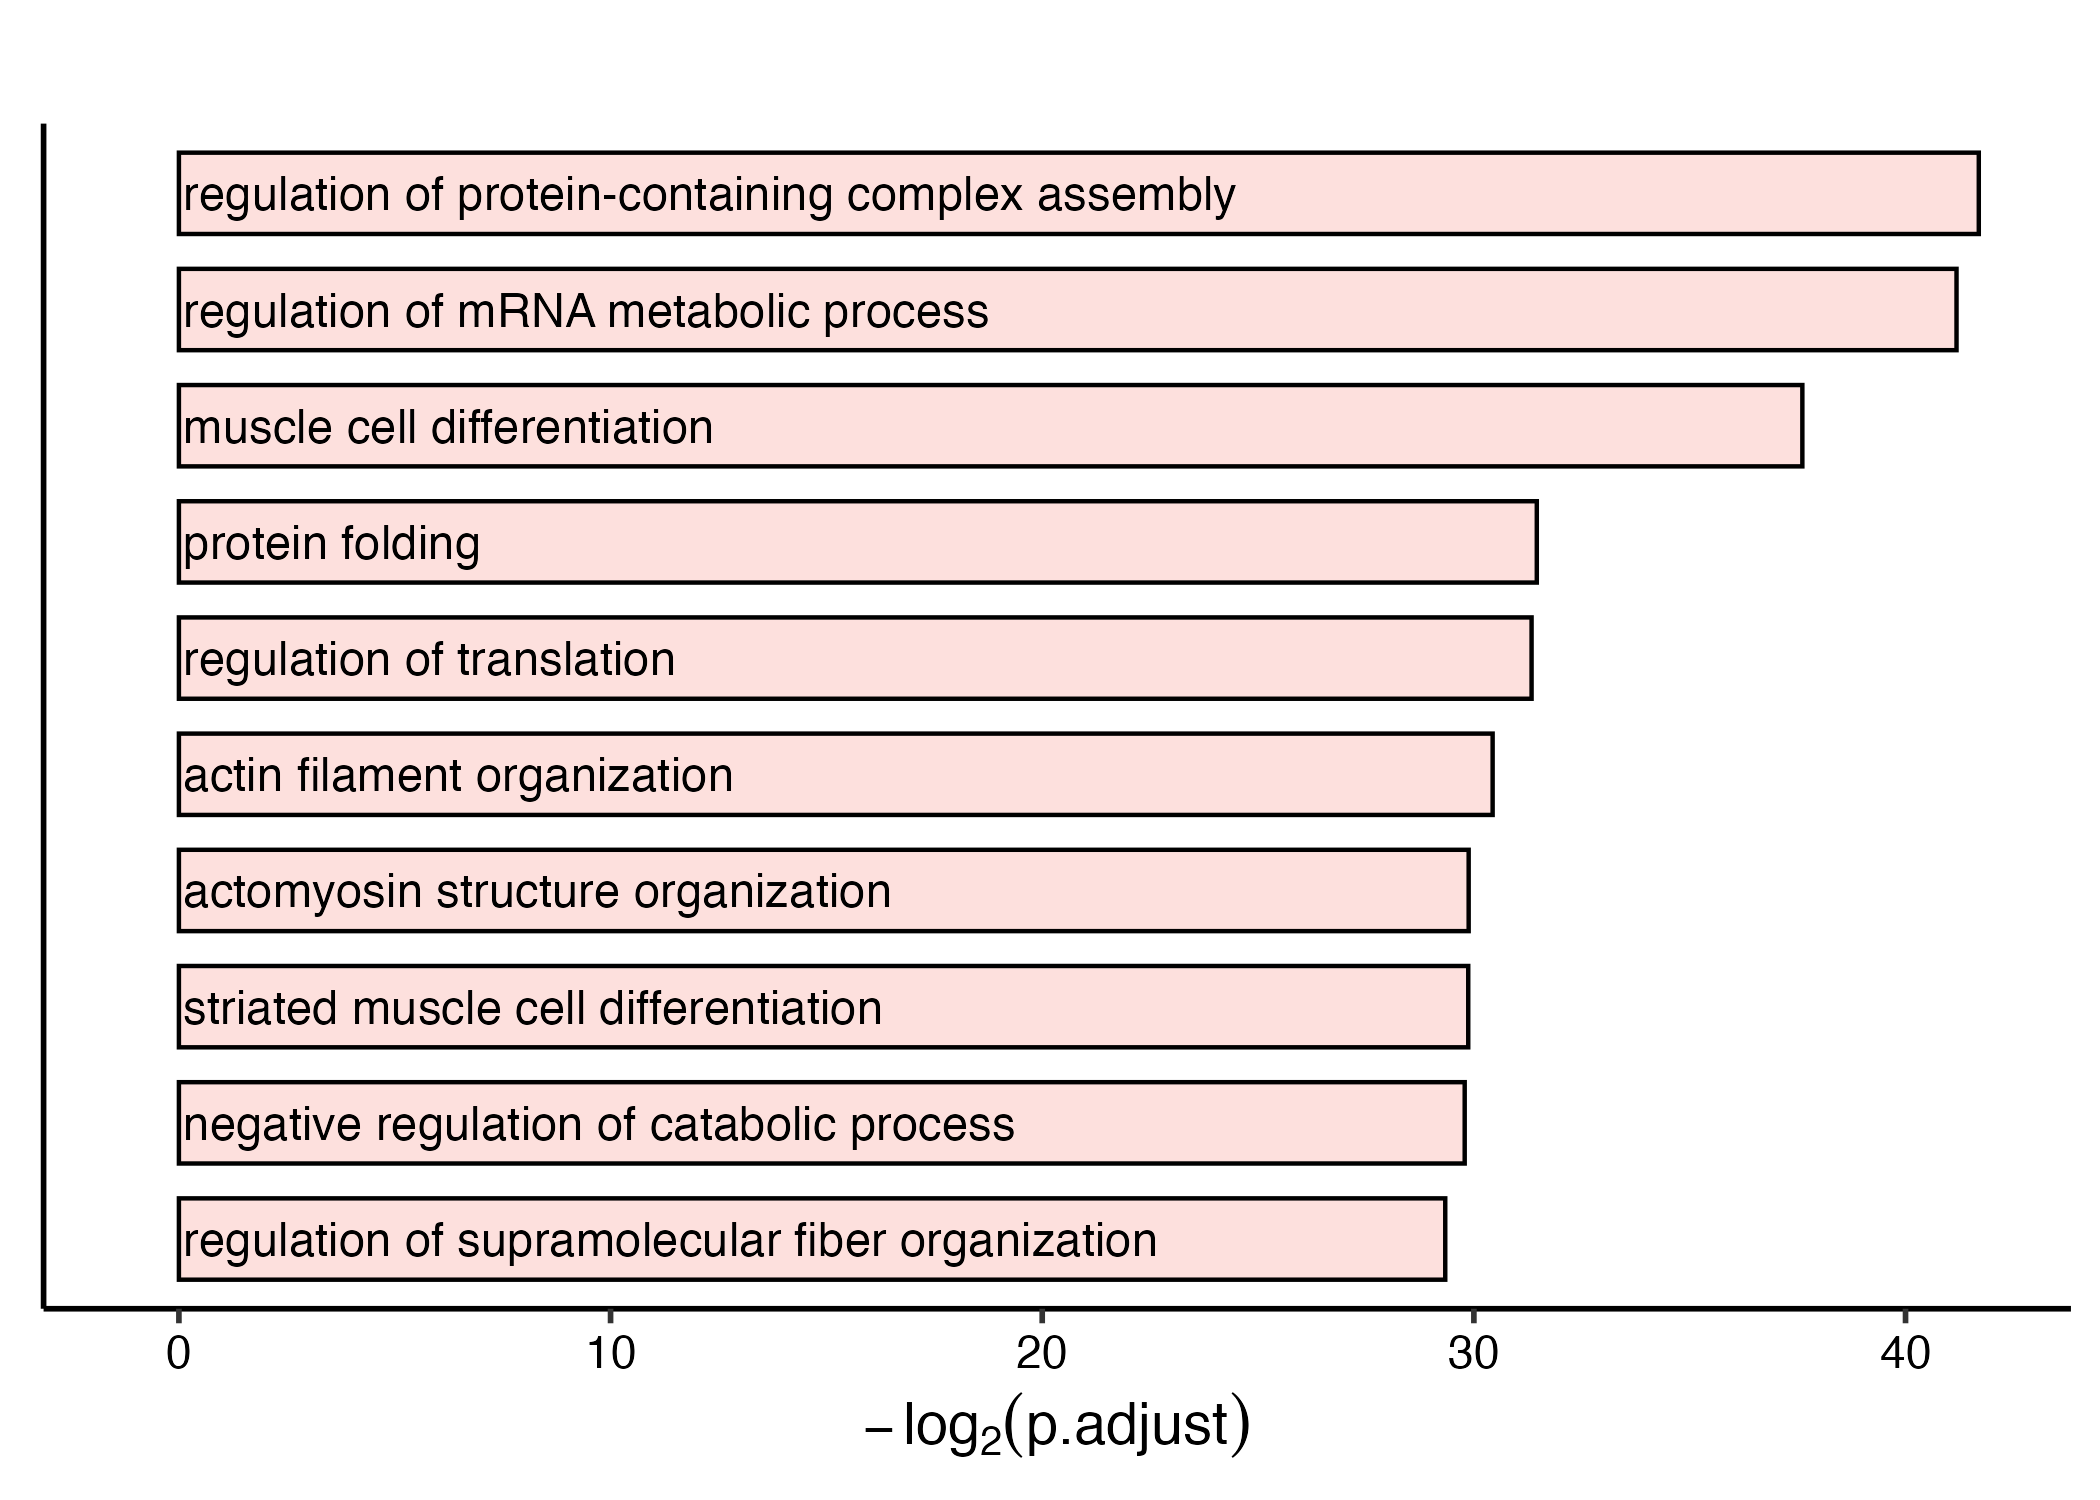

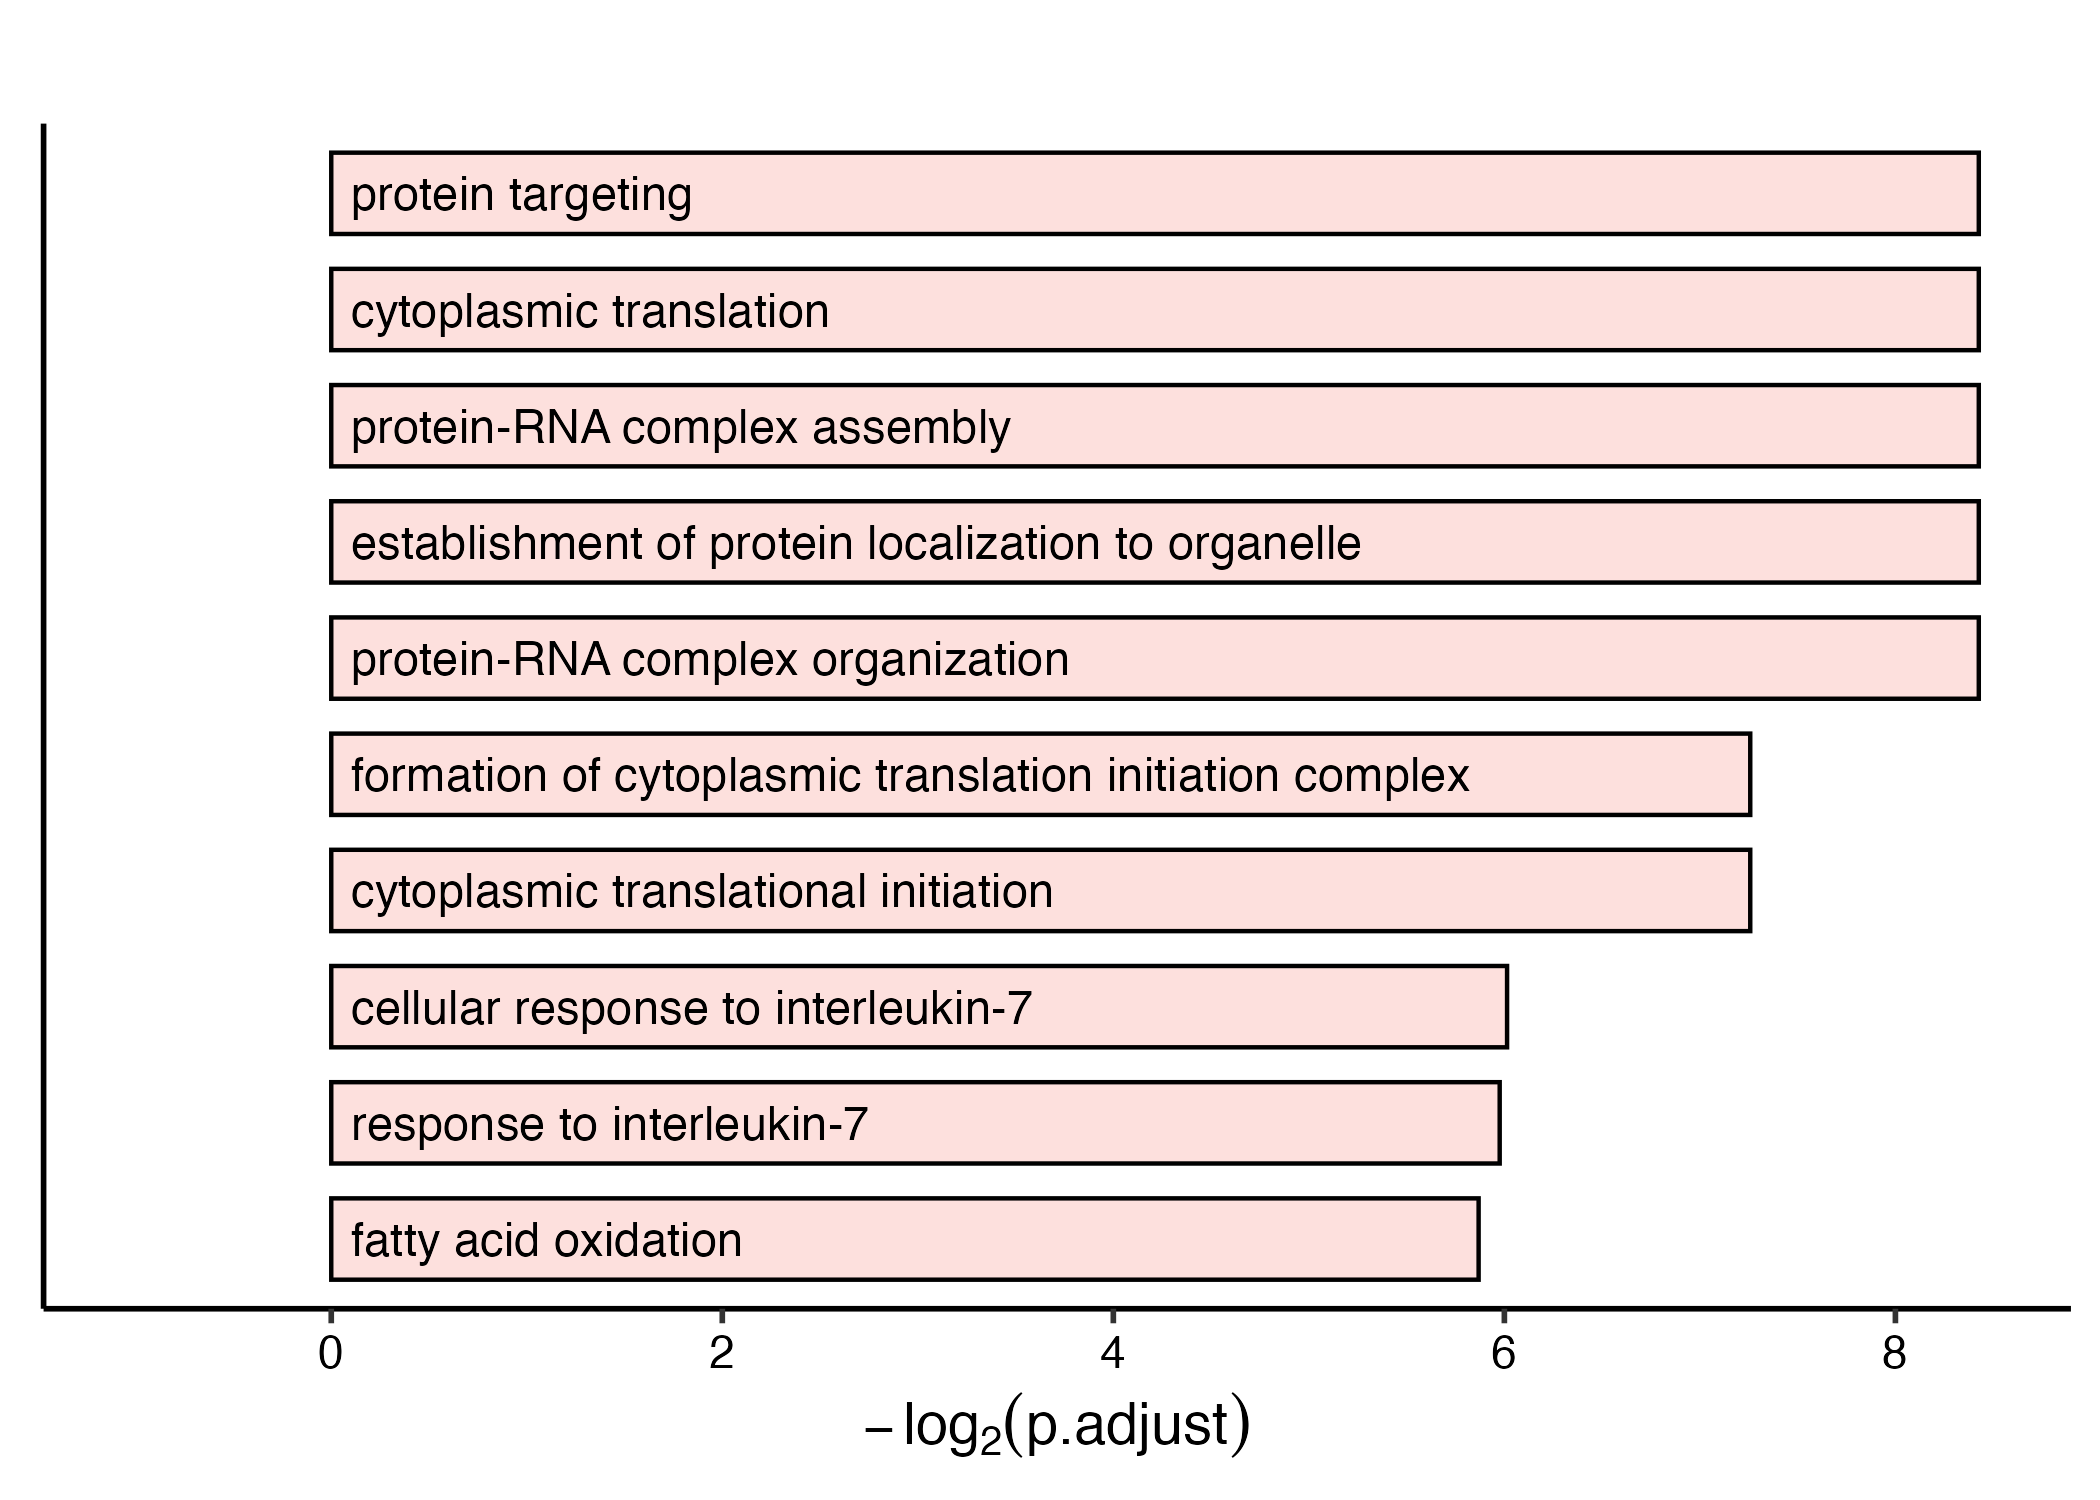
**

**A B C**

Functional enrichment analysis of rhythmic gene subgroups.

(A) Gene Ontology (GO) enrichment analysis of Rhythmic-Both genes, which exhibit conserved rhythmicity at both the RNA and protein levels. Enriched biological processes are primarily related to lipid biosynthetic and metabolic regulation.

(B) GO enrichment analysis of Rhythm-lost genes, which are rhythmic at the RNA level only. These genes are enriched in processes associated with translation regulation, protein folding, and mRNA metabolism.

(C) GO enrichment analysis of Rhythm-gained genes, which display rhythmicity exclusively at the protein level. Enriched terms include protein targeting, cytoplasmic translation, and fatty acid oxidation.

Bars represent the top enriched GO biological processes ranked by −log₂(p value).

**Supplementary Figures S3**

**
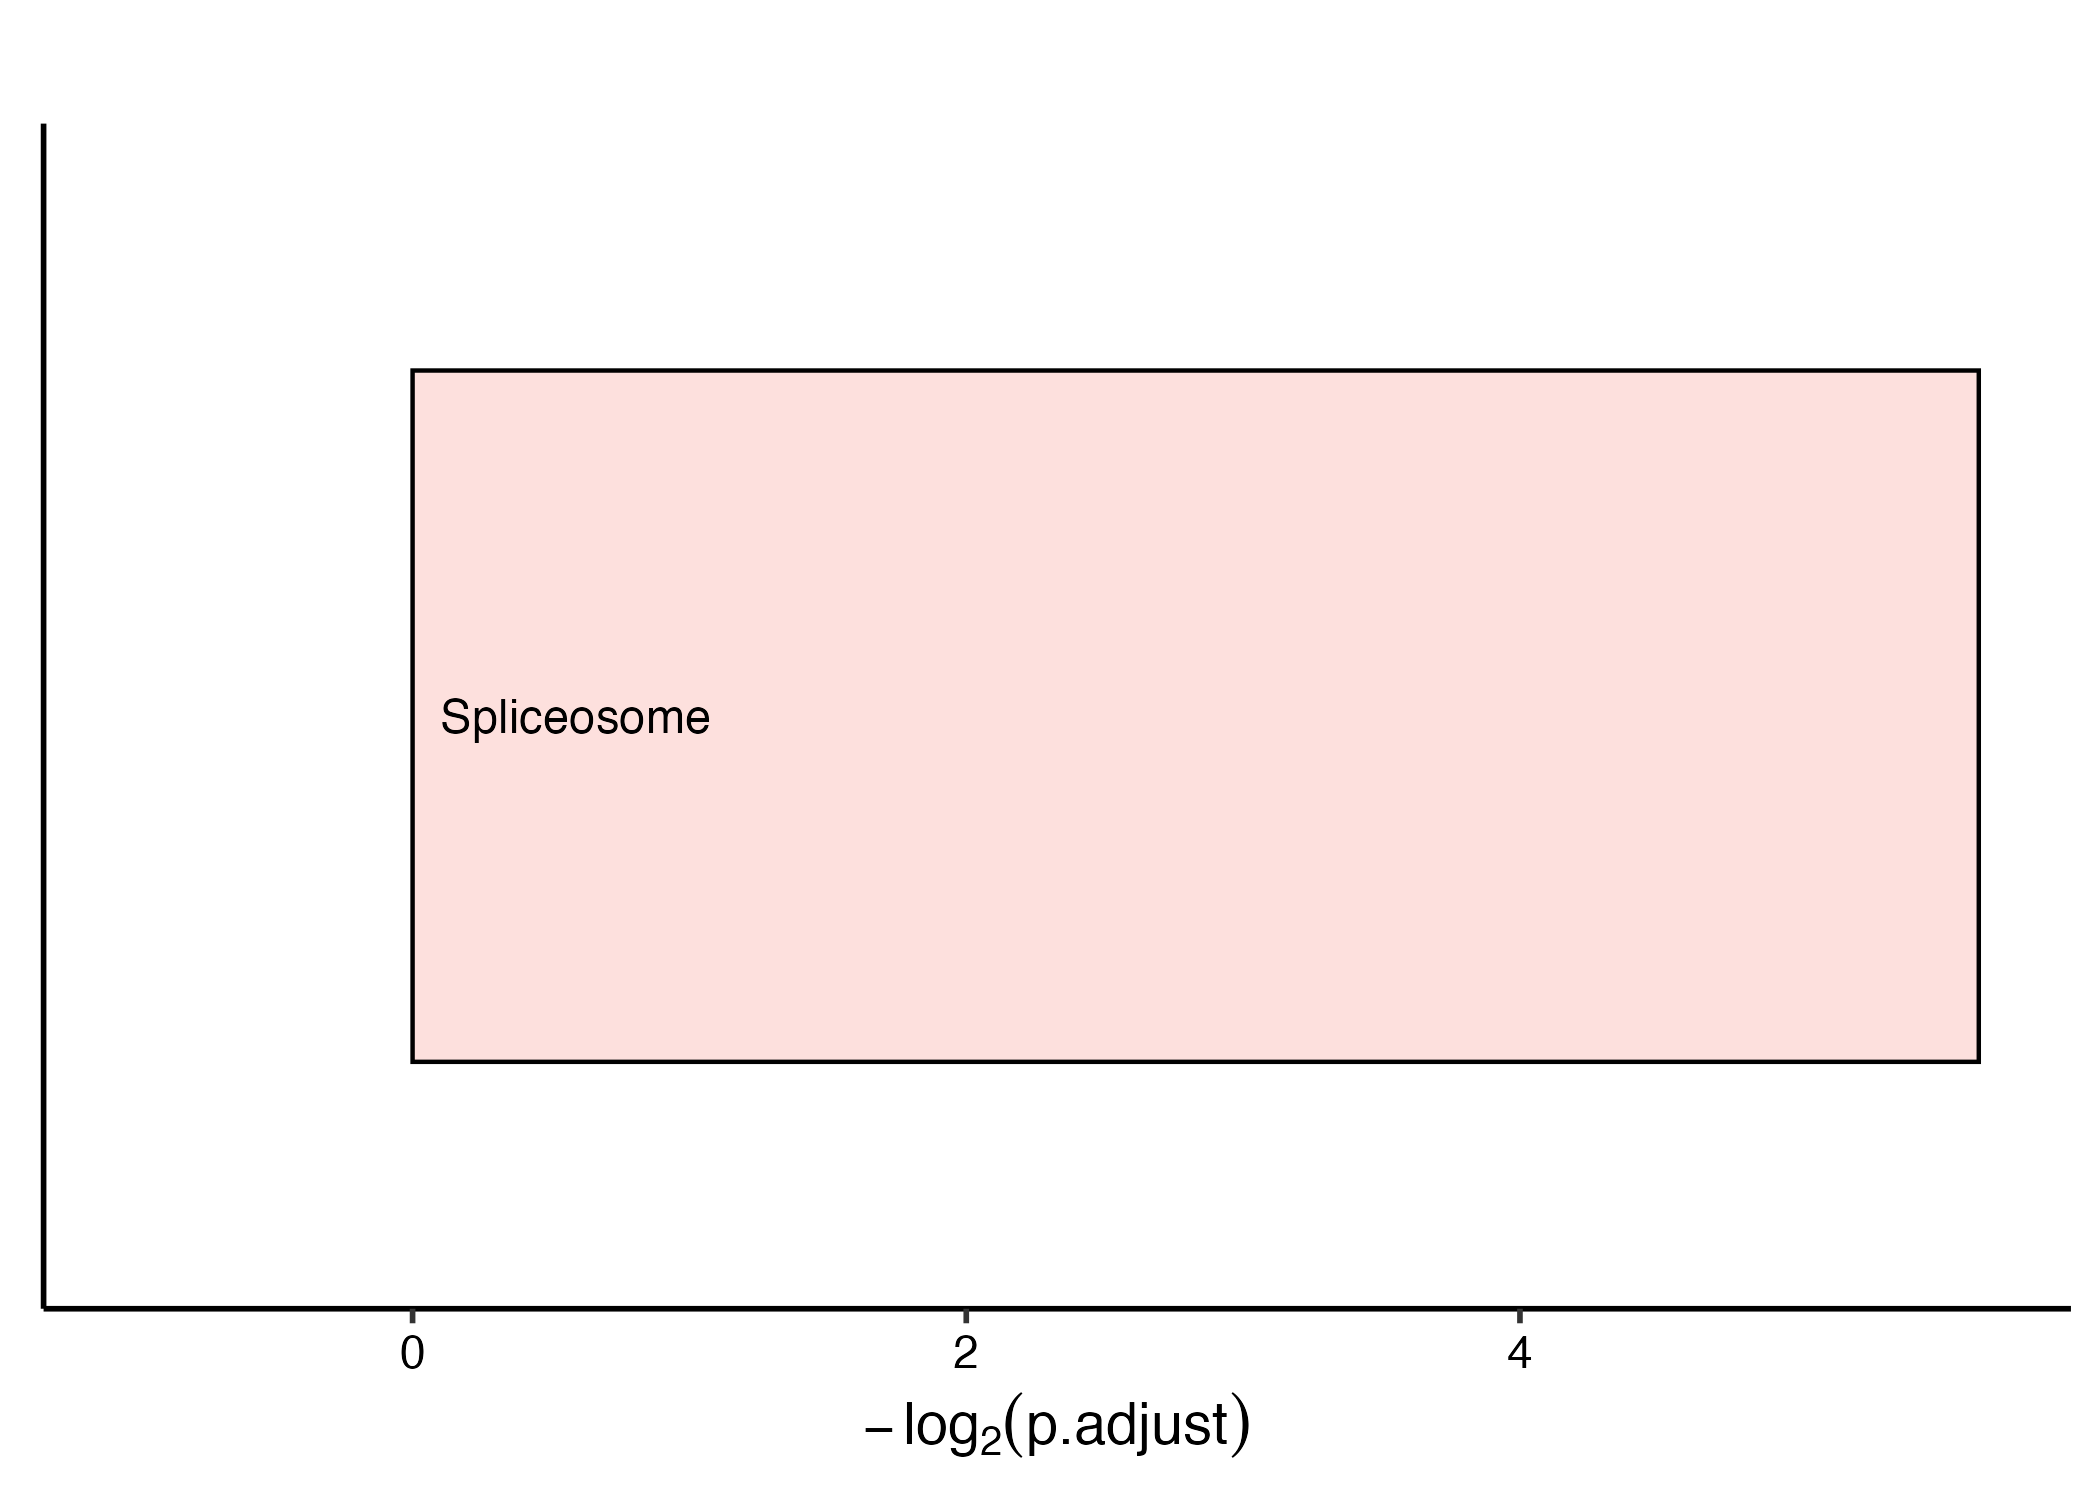

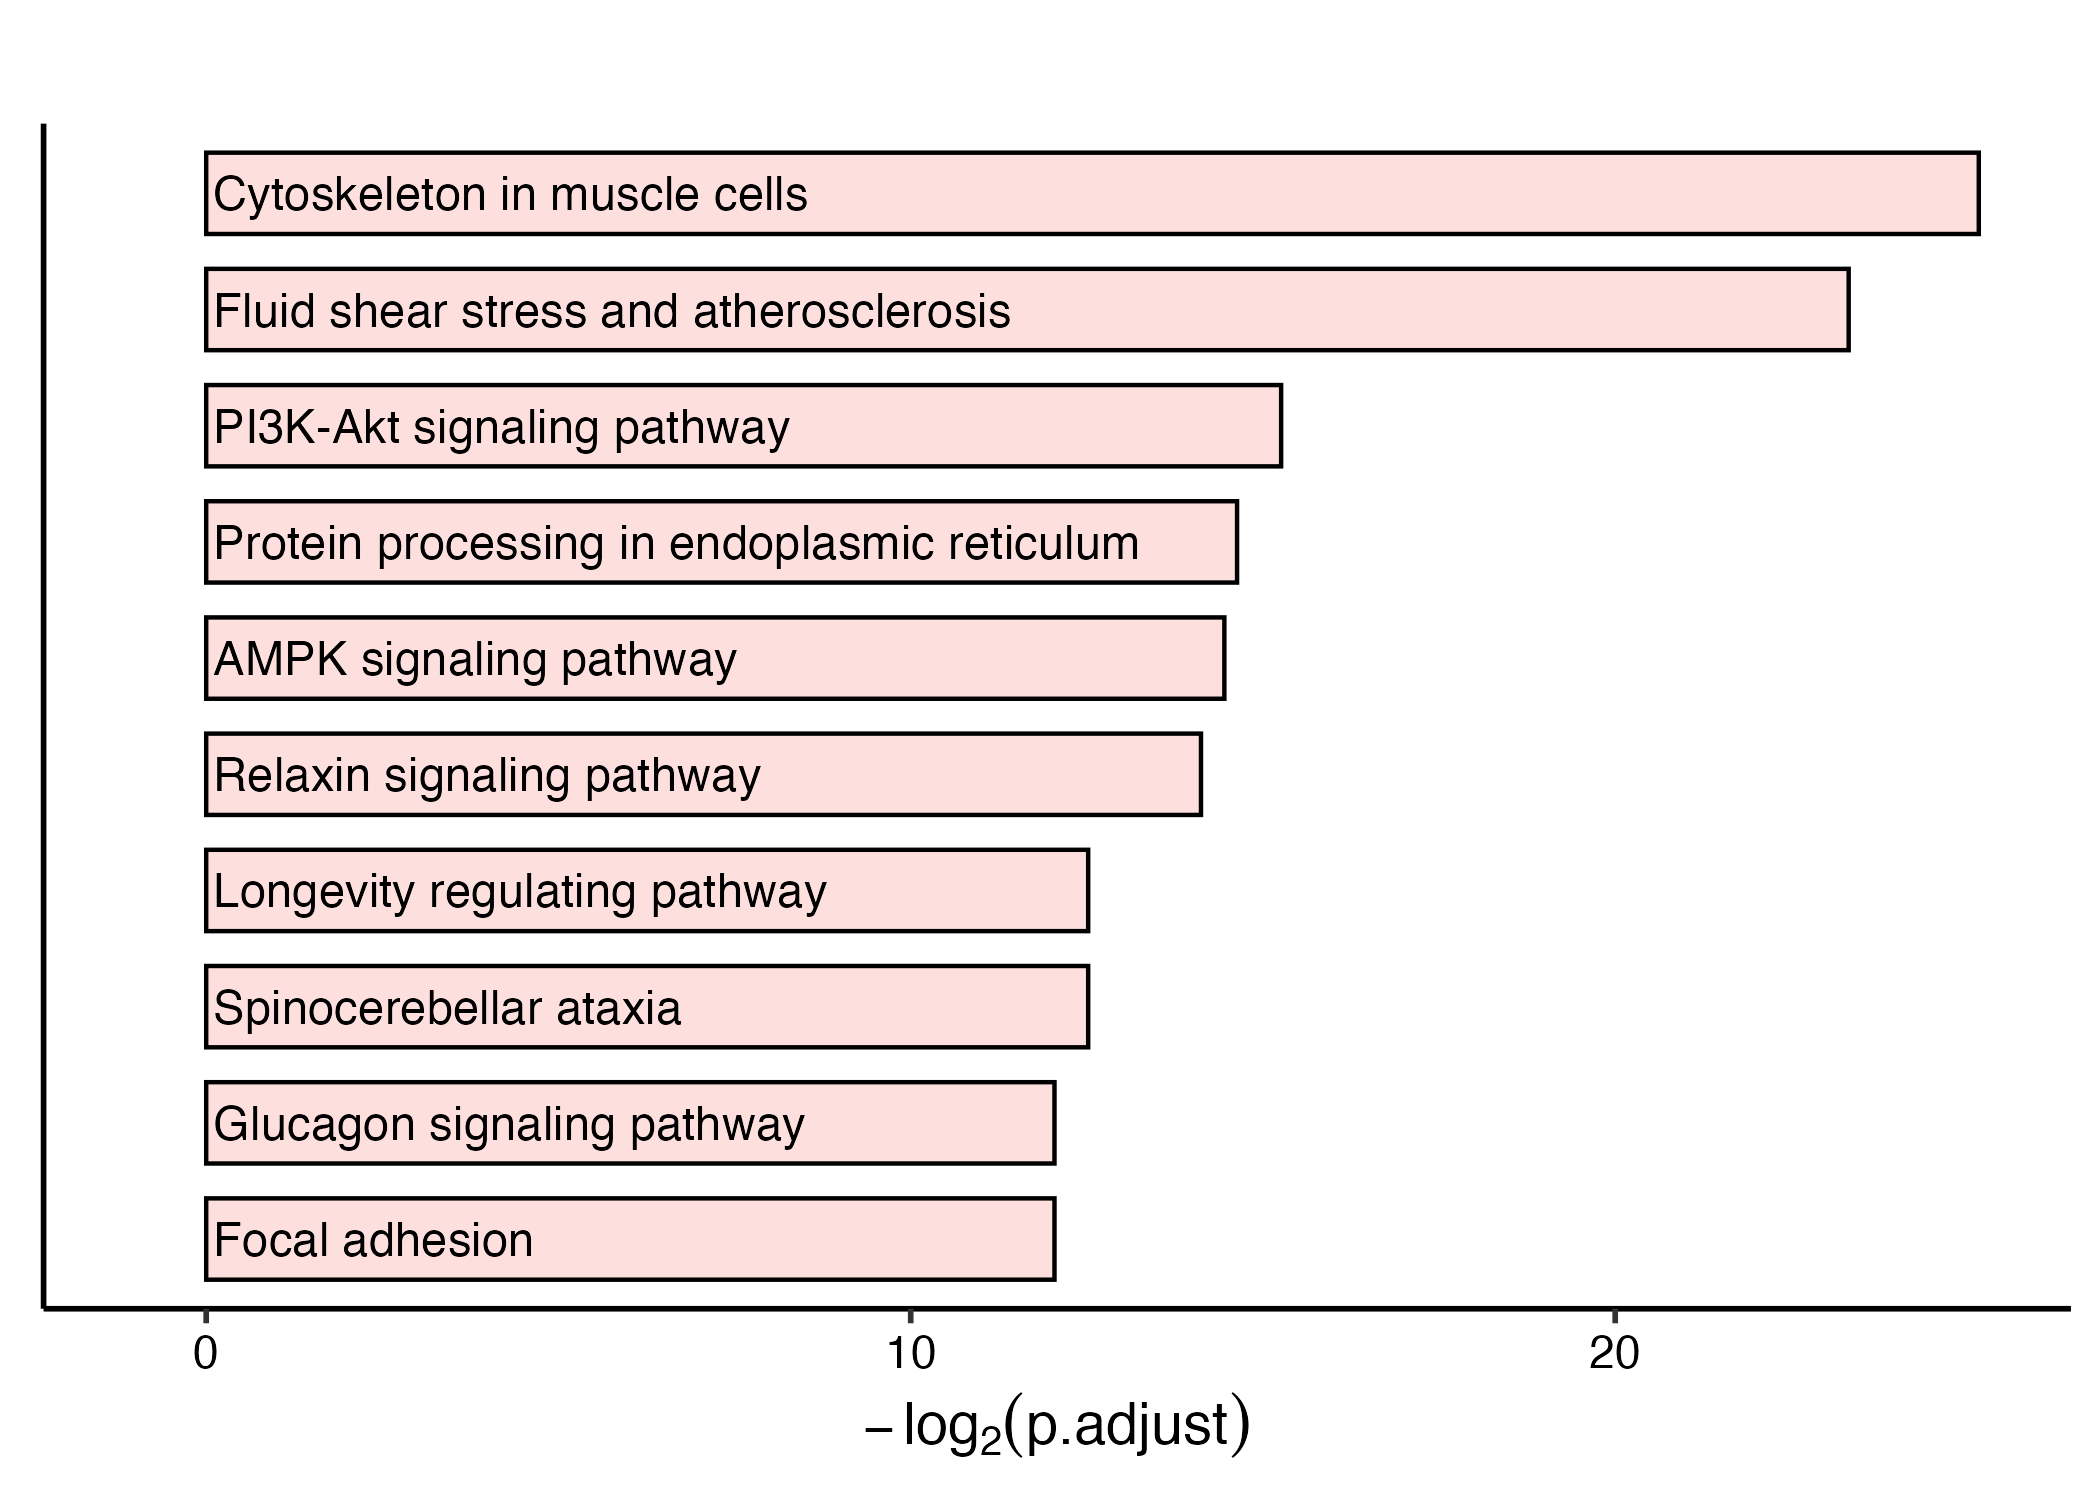
**

**A B**

Functional enrichment analysis of protein-leading and protein-lagging circadian genes.

(A) Gene Ontology (GO) enrichment analysis of protein-leading genes (ΔPhase < 0), in which protein expression peaks precede RNA expression. Enriched biological processes are predominantly related to lipid biosynthesis, gluconeogenesis, hexose biosynthetic processes, and acyl-CoA–associated metabolic pathways. Bars represent the top enriched GO terms ranked by −log₂(p.adjust).

(B) KEGG pathway enrichment analysis of protein-lagging genes (ΔPhase > 0), in which protein expression peaks follow RNA expression. The spliceosome pathway was the only significantly enriched term. Bars represent enriched pathways ranked by −log₂(p.adjust).

**Supplementary Figures S4**

**
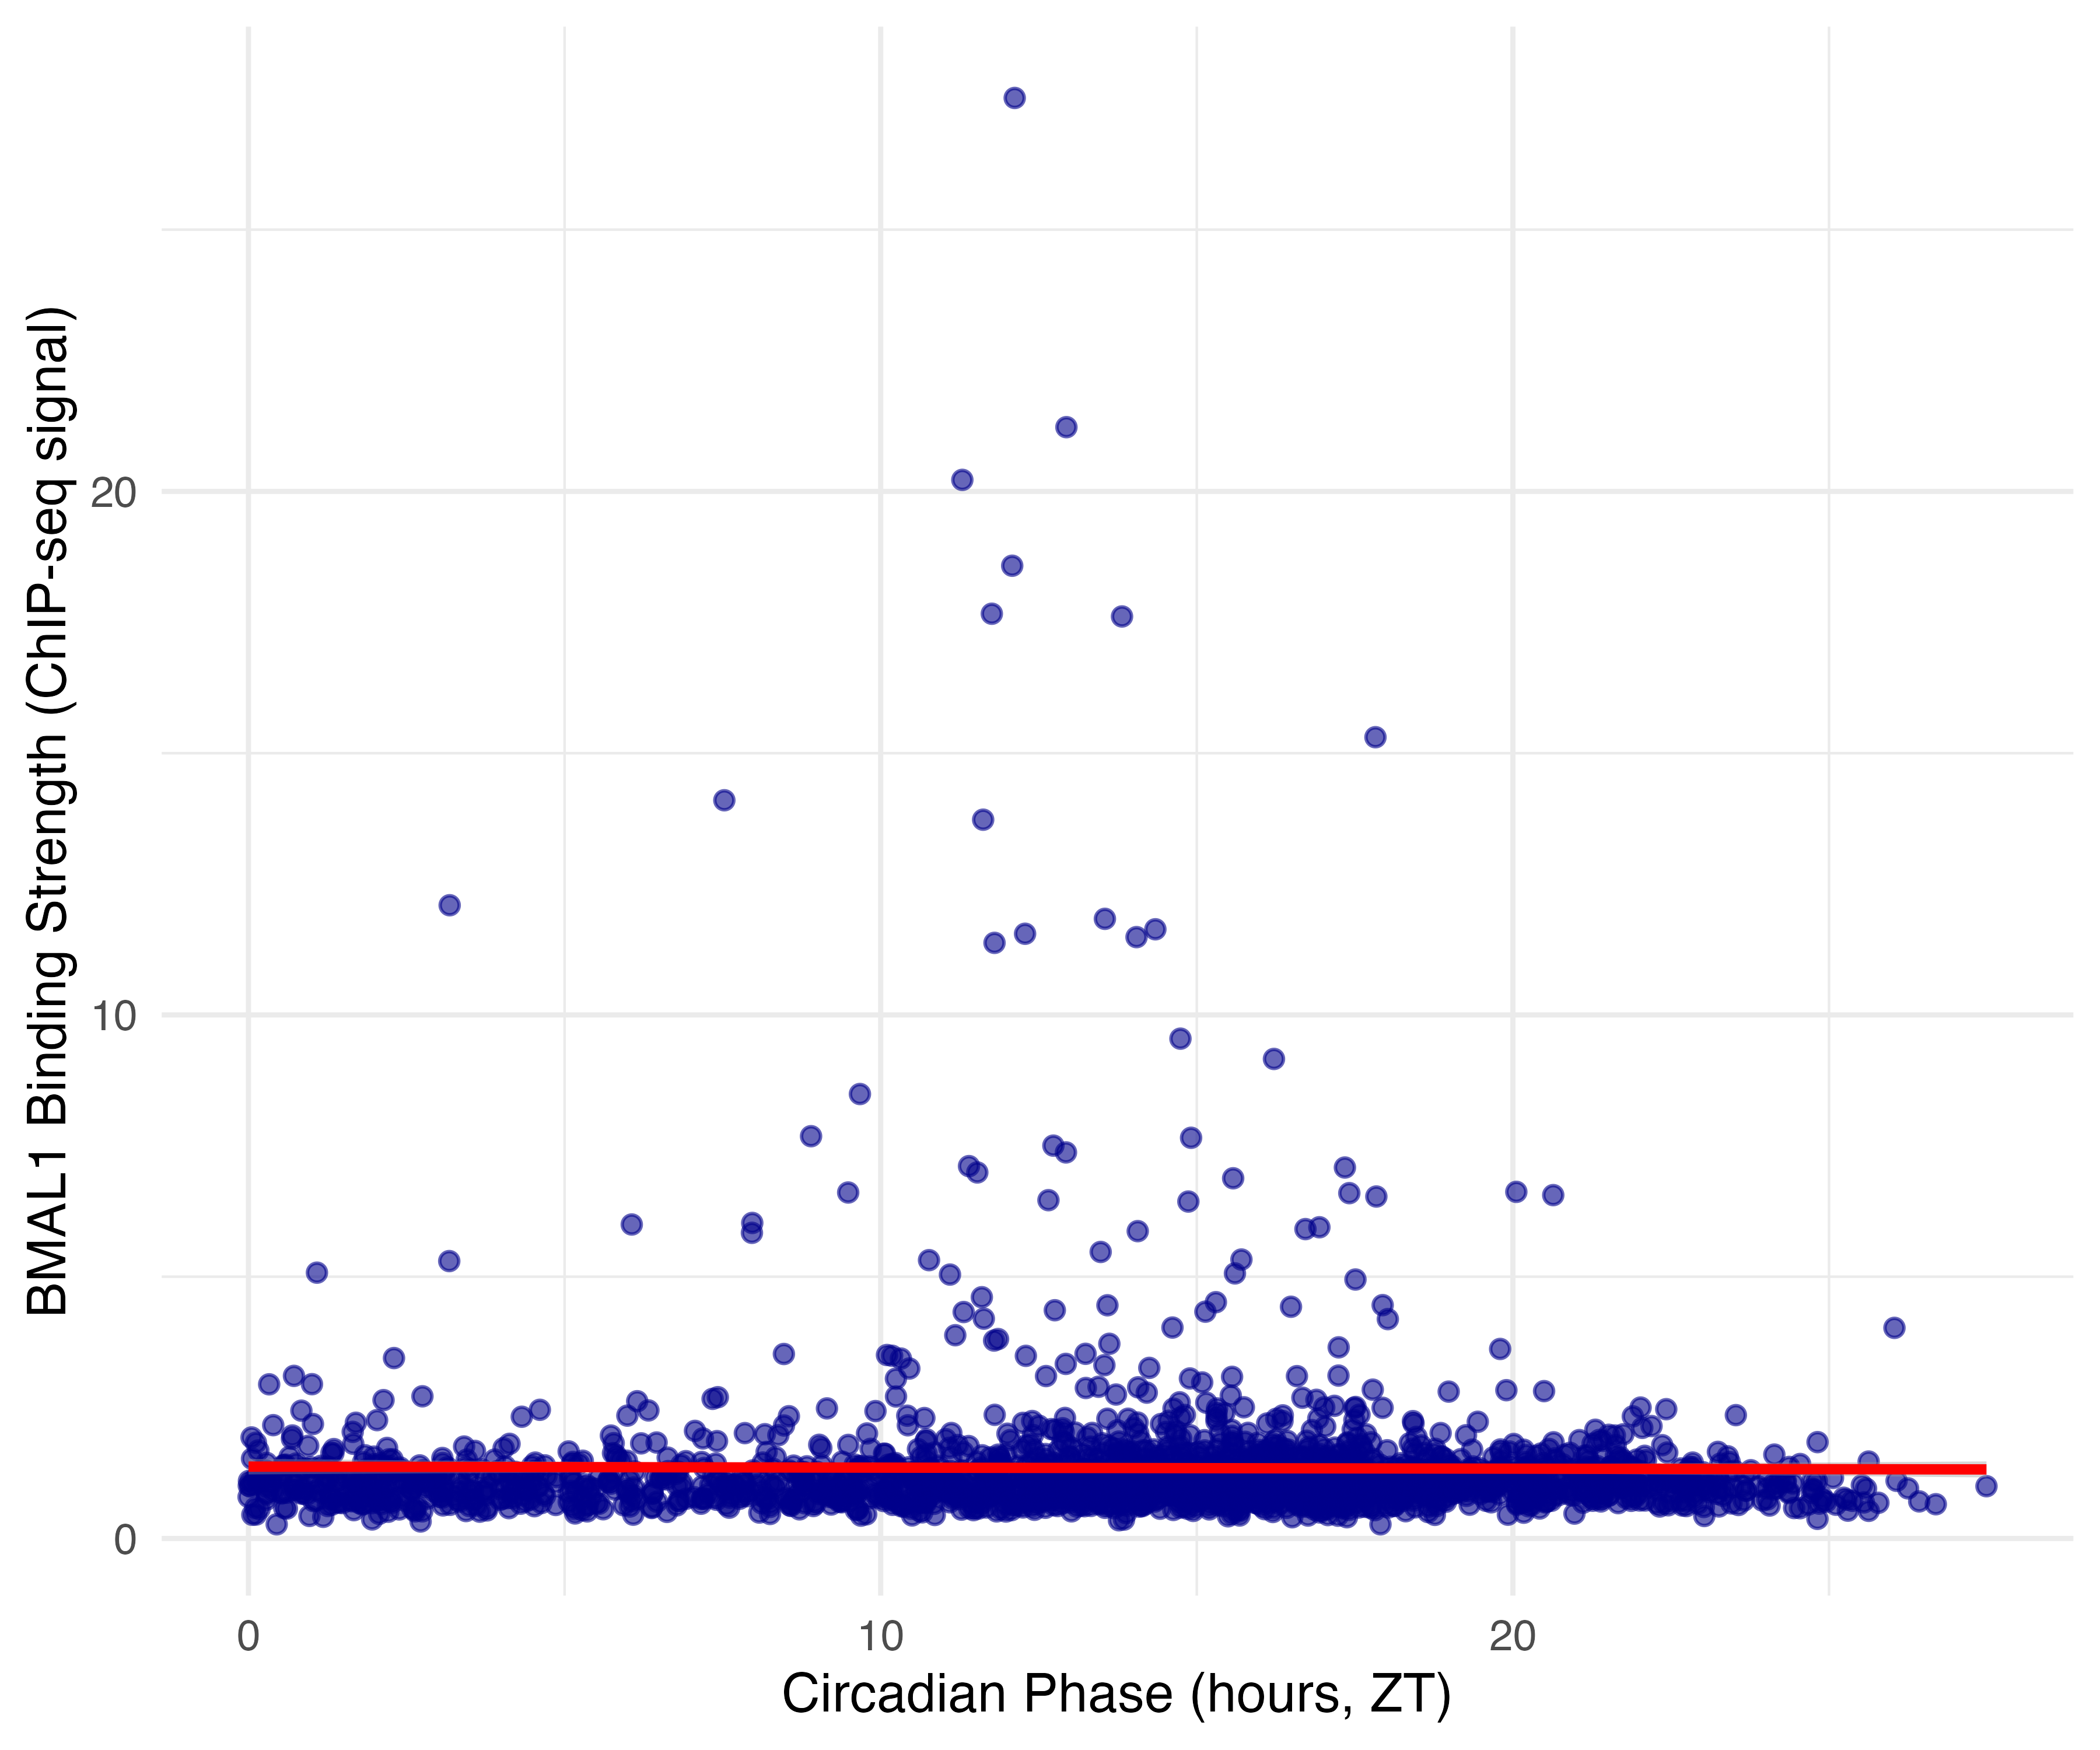
**

BMAL1 binding strength plotted against the RNA peak phase (ZT), showing a weak but statistically significant correlation (ρ = 0.046; p = 0.029). The red line indicates the linear regression fit; Spearman ρ and p values were calculated separately.

**Supplementary Figures S5**

**
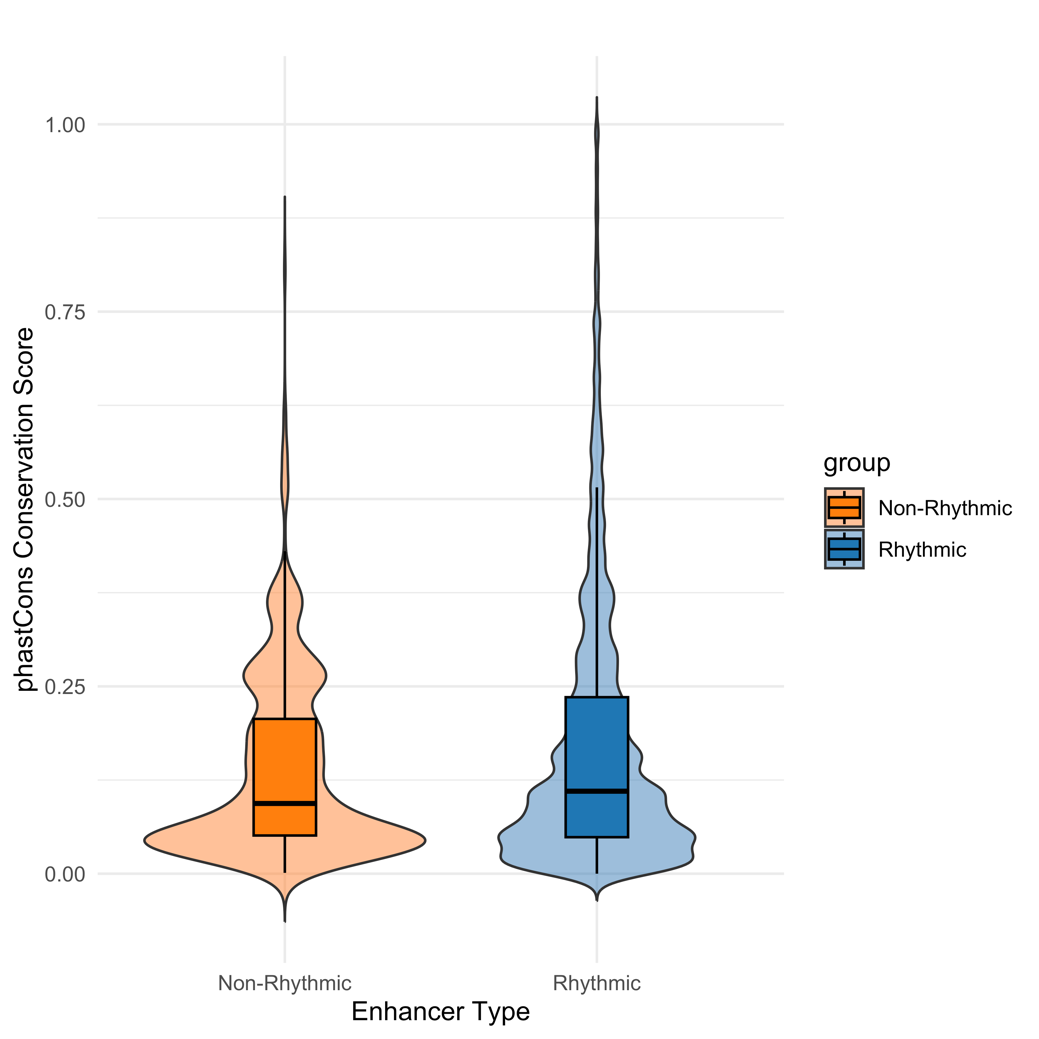
**

Conservation of rhythmic versus nonrhythmic enhancers.

Violin and box plots compare phastCons60way conservation scores between enhancers linked to rhythmic genes (blue) and nonrhythmic genes (orange). Enhancers associated with rhythmic genes show significantly higher conservation scores (Wilcoxon rank-sum test, p = 7.3 × 10⁻⁸).

**Supplementary Figures S6**

**
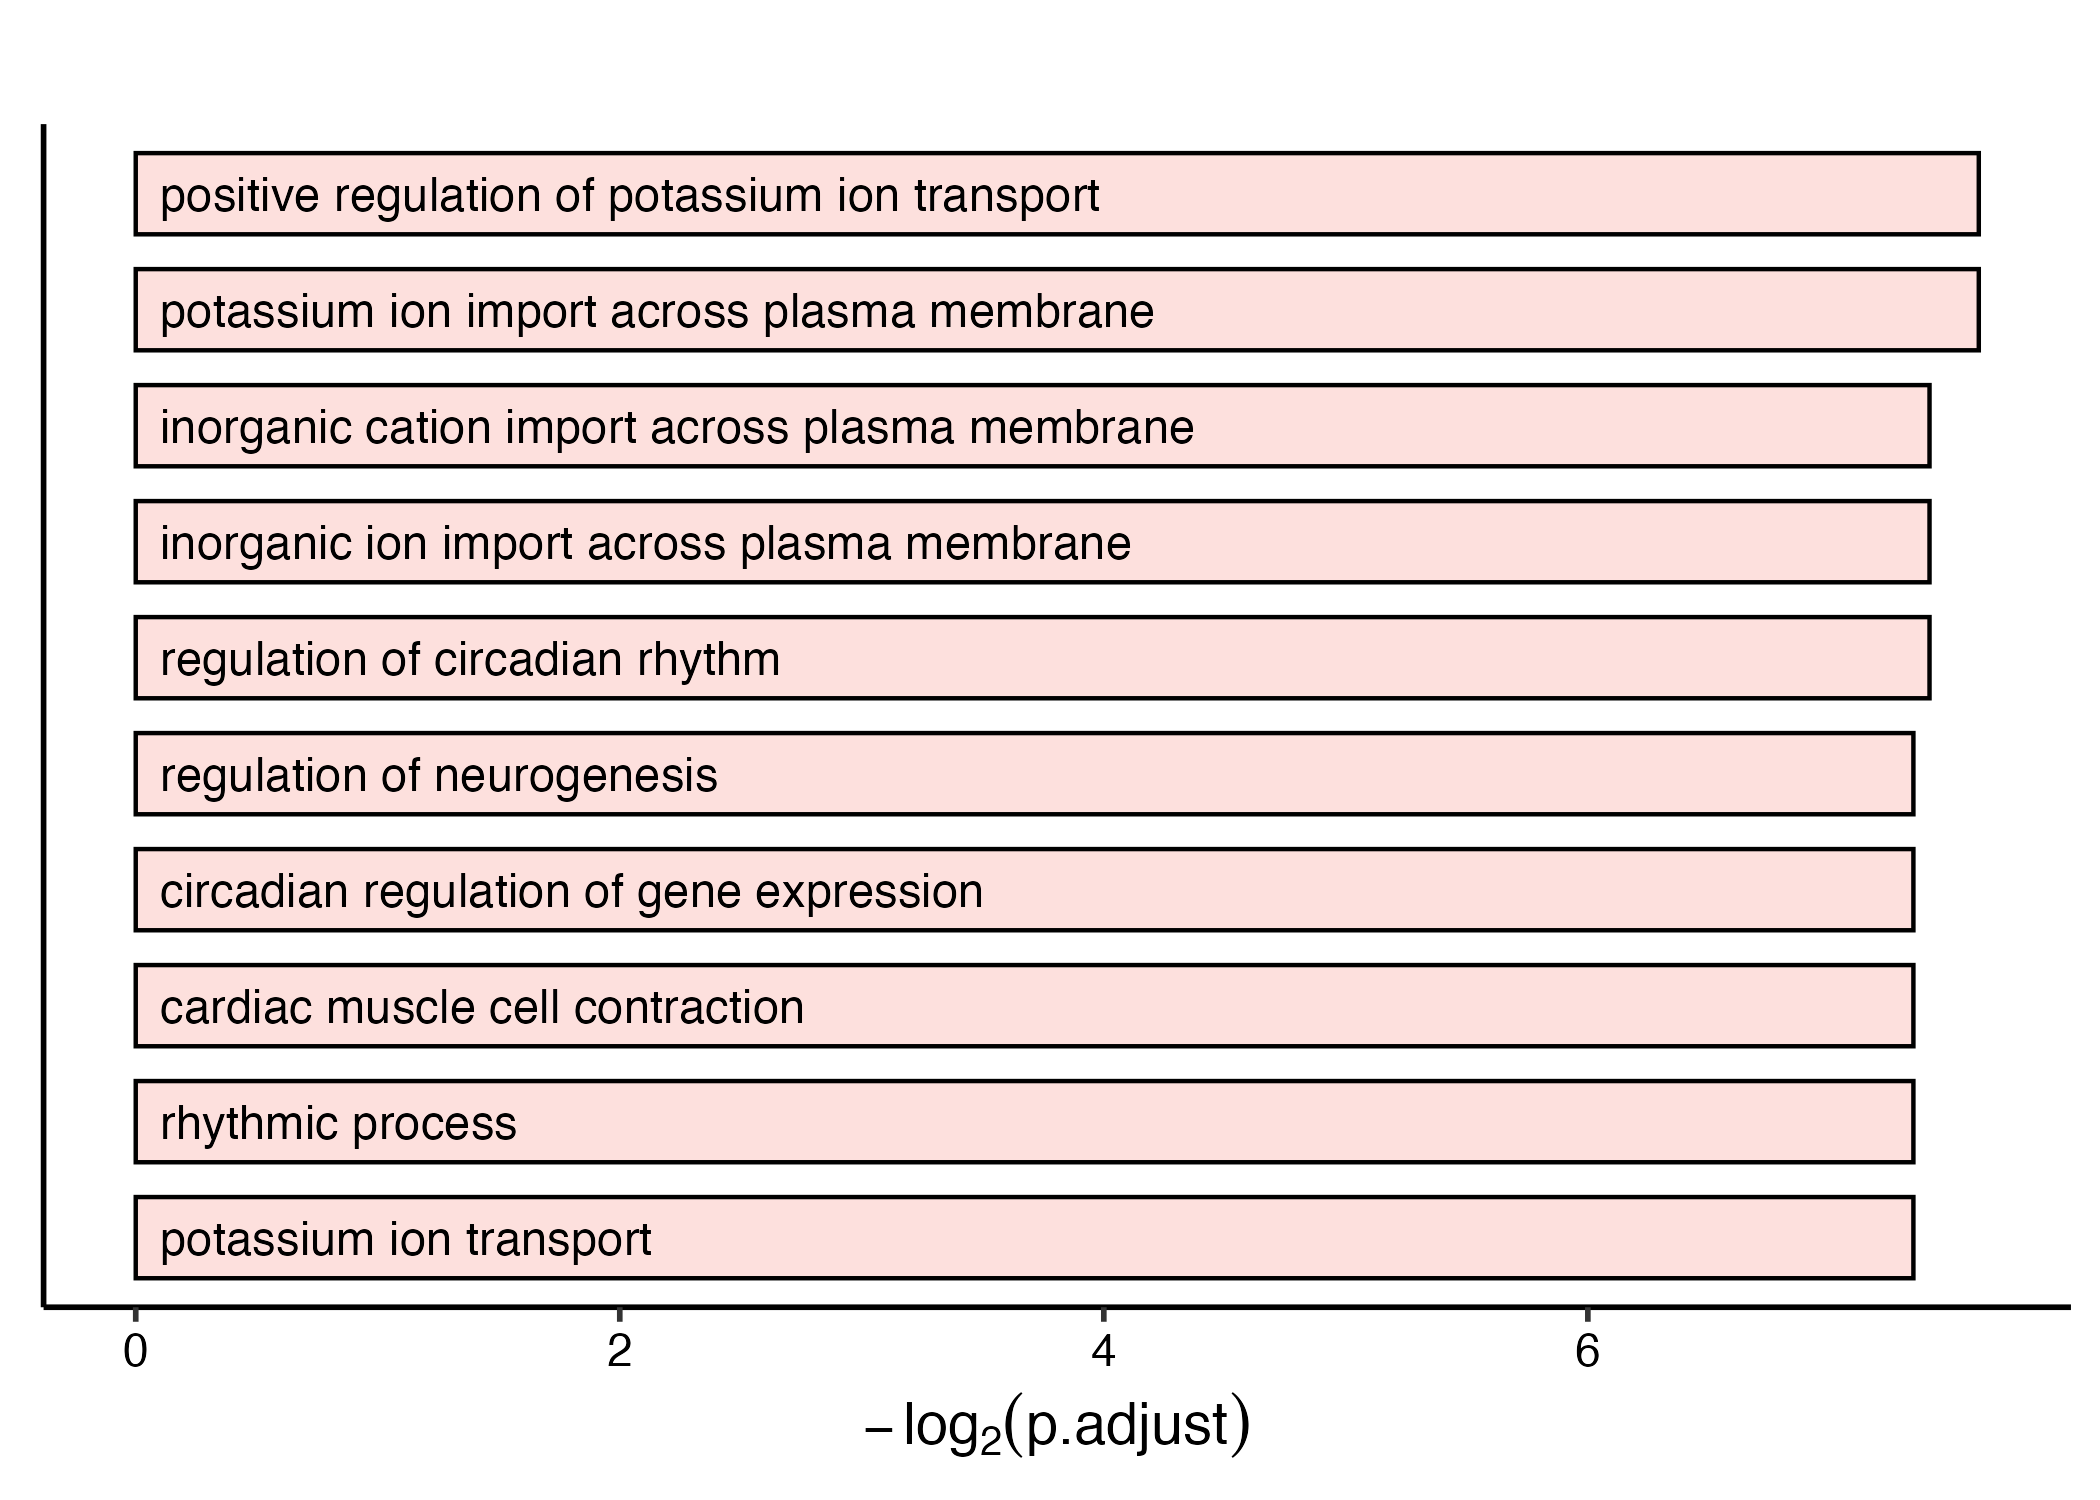

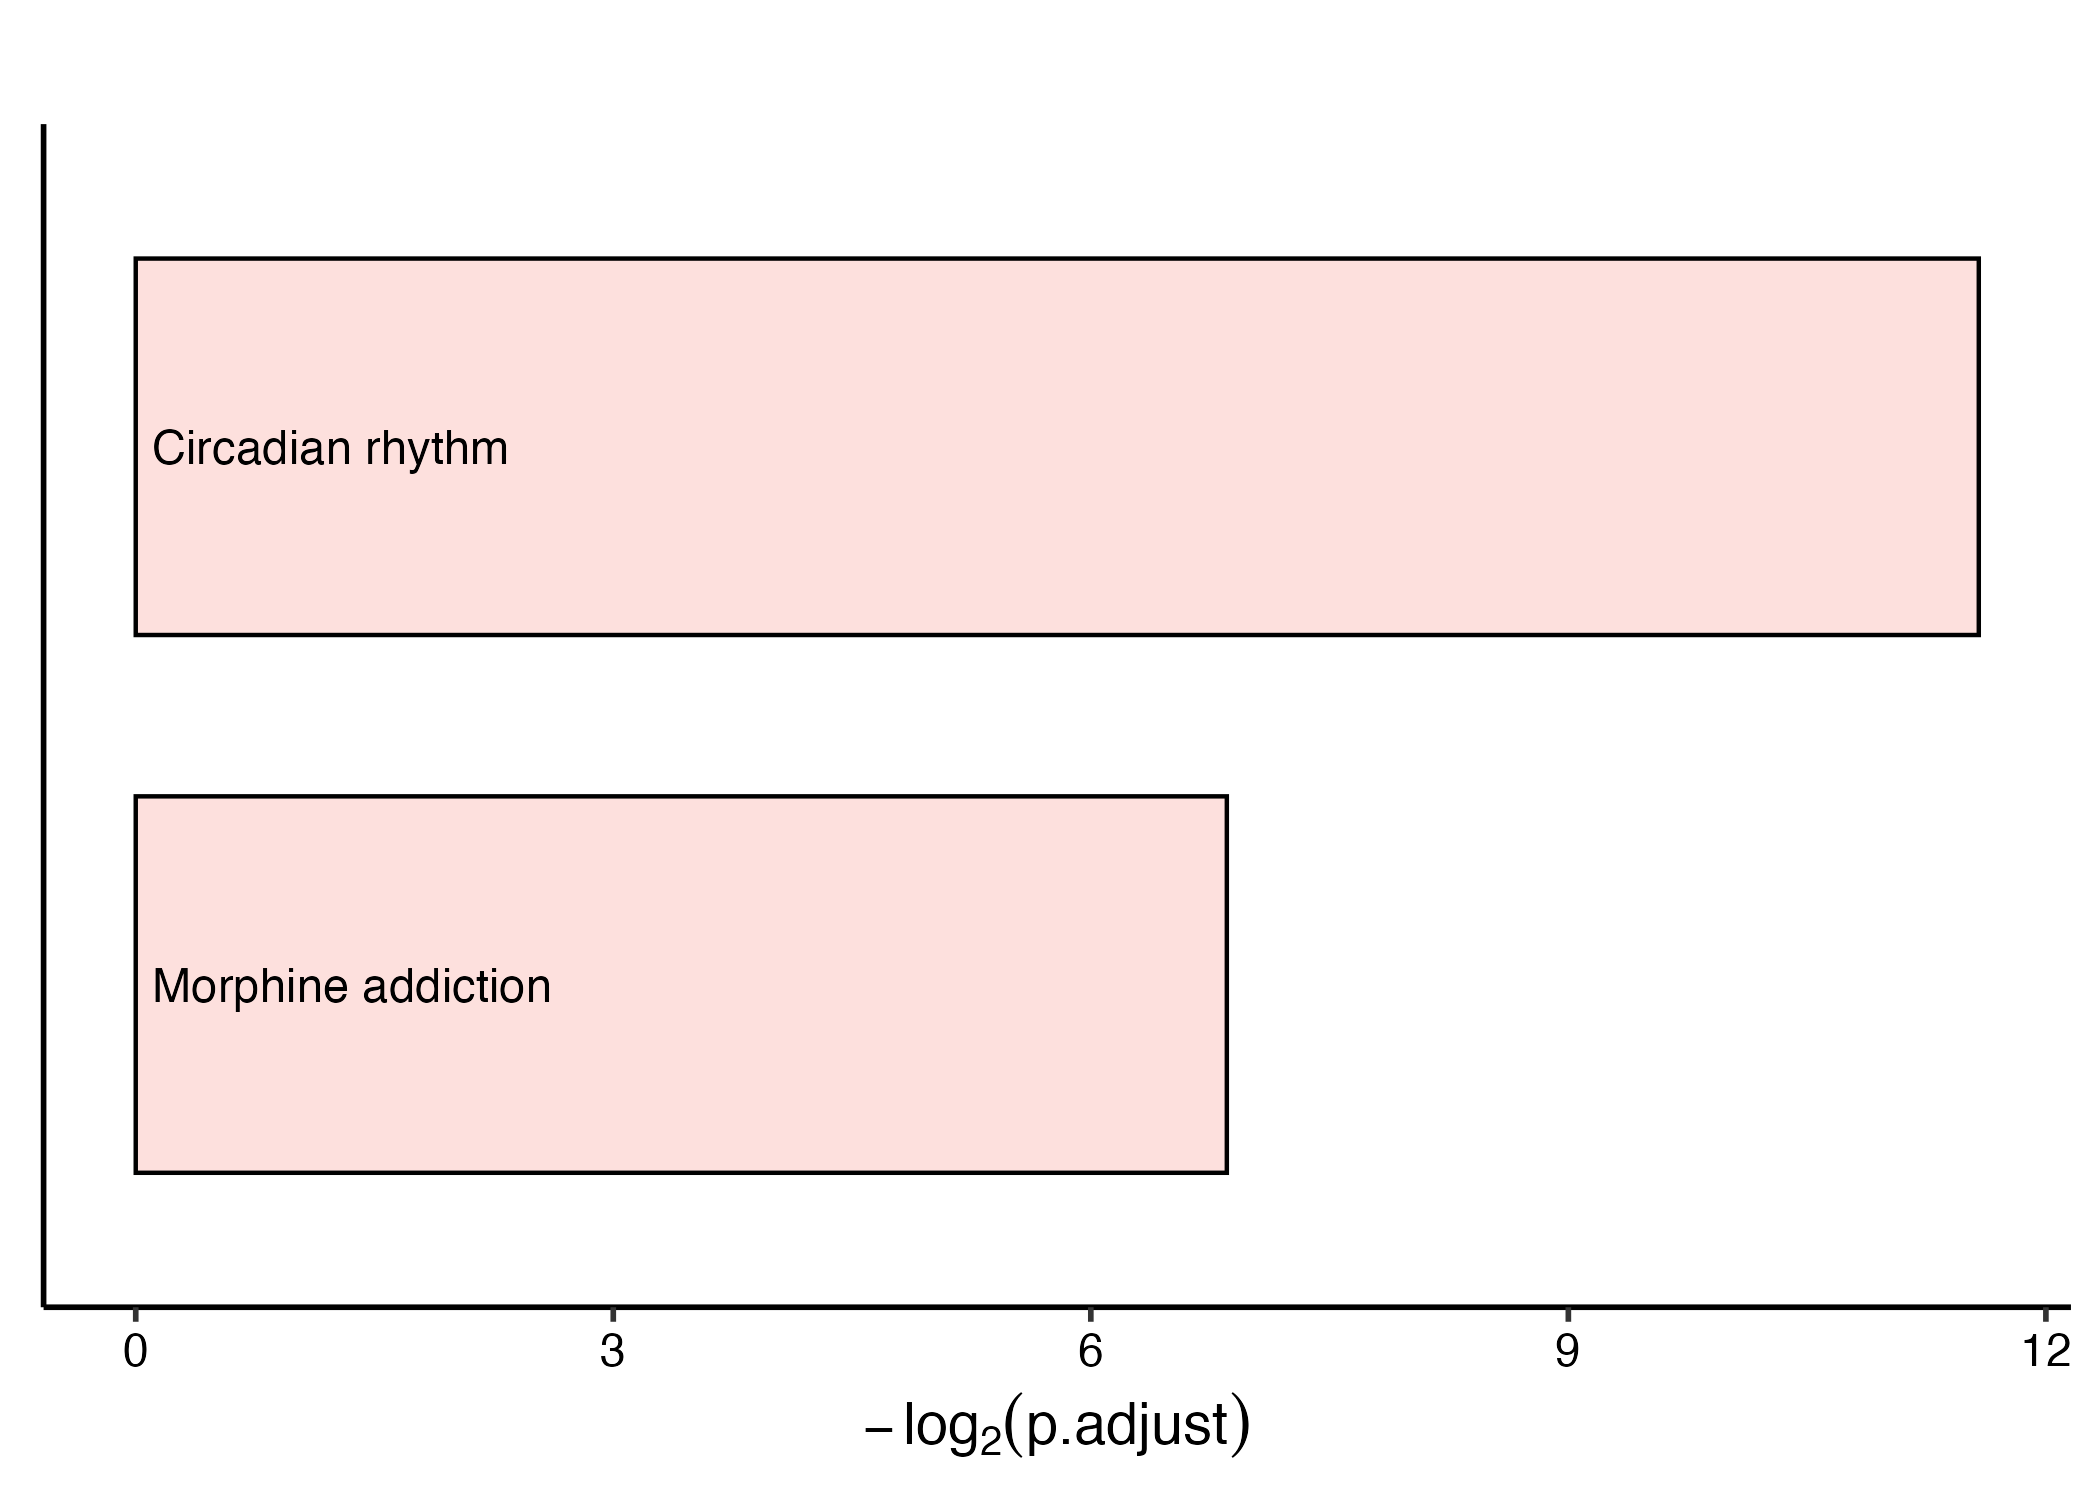
**

**A B**

Functional enrichment analysis of genes associated with typical rhythmic enhancers.

(A) Gene Ontology (GO) analysis of 205 high-confidence enhancer–gene pairs revealed significant enrichment in biological processes related to potassium ion transport, circadian gene regulation, and cardiac muscle contraction. The top 10 terms are shown on the basis of −log₂(p.adjust) values.

(B) KEGG pathway analysis revealed that these enhancer-associated genes are involved in circadian rhythm and morphine addiction pathways. The bars represent significantly enriched pathways ranked by −log₂(p.adjust).

**Supplementary Figures S7**

BMAL1 Binding Overlap in Typical Rhythmic Enhancers

Pie chart showing the proportion of typical rhythmic enhancers (n = 16,640) overlapping BMAL1 ChIP-seq peaks (n = 137, 0.82%)
